# Supplementary material
Source: PubMed Central journal article supplement (PMC9709661)
Supplement: NIHMS1842605-supplement-Appendices.pdf [file NIHMS1842605-supplement-Appendices.pdf]

**Appendix Table A1a.** List and descriptions of variables included in initial analysis\*

| Variable Name                 | Description                                                                                         |
|-------------------------------|-----------------------------------------------------------------------------------------------------|
| TibiaLength_cm                | Tibia Length                                                                                        |
| HipStrengthHeightRatio        | Peak isokinetic hip abductor torque (normalized to height)                                          |
| HipStrengthThighRatio         | Peak isokinetic hip abductor torque (normalized to thigh length)                                    |
| IsokHip                       | Peak isokinetic hip abductor torque                                                                 |
| IsokKneeExt                   | Peak isokinetic knee extensor torque                                                                |
| IsokKneeFlex                  | Peak isokinetic knee flexor torque                                                                  |
| KT20                          | Joint laxity                                                                                        |
| KT30                          | Joint laxity                                                                                        |
| KneeExtStrengthNormalizedNmkg | Peak isokinetic knee extensor torque (normalized to weight)                                         |
| Qangle                        | Standing quadriceps angle                                                                           |
| QuadHamRatio                  | Ratio of peak isokinetic knee extensor strength to knee flexor strength                             |
| AnkleAngleZEROYMINLAND        | Peak rearfoot eversion angle during landing                                                         |
| AnkleAngleZEROYROMLAND        | Rearfoot eversion angular range of motion during landing                                            |
| AnkleMomentPROXIMALXIMPSTANCE | Plantarflexor impulse (area under moment curve) during stance                                       |
| AnkleMomentPROXIMALXMAXLAND   | Peak plantarflexor moment during landing                                                            |
| AnkleMomentPROXIMALXROMLAND   | Plantarflexor moment range of values (max – min) during landing                                     |
| AnkleMomentPROXIMALYROMLAND   | Rearfoot eversion moment range of values (max – min) during landing                                 |
| AnkleMomentPROXIMALZIMPLAND   | Internal ankle rotator impulse (area under moment curve) during land                                |
| AnkleMomentPROXIMALZIMPSTANCE | Internal ankle rotator impulse (area under moment curve) during stance                              |
| AnkleMomentPROXIMALZMAXLAND   | Peak internal ankle rotator moment during landing                                                   |
| AnkleStiffnessIntercept       | y-intercept of regression equation modeling ankle stiffness (ankle angle vs. ankle moment)          |
| AnkleStiffnessR2              | R <sup>2</sup> value of regression equation modeling ankle stiffness (ankle angle vs. ankle moment) |

|                             |                                                                                      |
|-----------------------------|--------------------------------------------------------------------------------------|
| AnkleStiffnessSlope         | Slope of regression equation modeling ankle stiffness (ankle angle vs. ankle moment) |
| BodyCOGZMAXLAND             | Highest vertical position of the body's center of gravity during landing             |
| BodyCOGZMINLAND             | Lowest vertical position of the body's center of gravity during landing              |
| BodyCOGZROMLAND             | Range of vertical displacement of the body's center of gravity during landing        |
| GRFUnfilteredZIMPLAND       | Vertical GRF impulse (area under GRF curve) during landing                           |
| GRFUnfilteredZIMPSTANCE     | Vertical GRF impulse (area under GRF curve) during stance                            |
| GRFUnfilteredZMAXLAND       | Peak vertical GRF during landing                                                     |
| GRFUnfilteredZMAXTO         | Peak vertical GRF during toe-off                                                     |
| HipAngleZEROXMAXLAND        | Peak hip flexion during landing                                                      |
| HipAngleZEROXROMLAND        | Hip flexion range of motion during landing                                           |
| HipAngleZEROYIC             | Frontal plane hip angle at initial contact                                           |
| HipAngleZEROYMAXLAND        | Peak hip adduction angle during landing                                              |
| HipAngleZEROZMAXLAND        | Peak hip internal rotation angle during landing                                      |
| HipAngleZEROZMINLAND        | Peak hip external rotation angle during landing                                      |
| HipAngleZEROZROMLAND        | Transverse plane hip angular range of motion during landing                          |
| HipJointCenterZROMLAND      | Range of vertical displacement of the hip joint center during landing                |
| HipMomentPROXIMALXMAXLAND   | Peak hip extensor moment during landing                                              |
| HipMomentPROXIMALXMINLAND   | Peak hip flexor moment during landing                                                |
| HipMomentPROXIMALYIMPSTANCE | Frontal plane hip impulse (area under the moment curve) during stance                |
| HipMomentPROXIMALYMAXLAND   | Peak hip abductor moment during landing                                              |
| HipMomentPROXIMALYMINLAND   | Peak hip adductor moment during landing                                              |
| HipMomentPROXIMALYROMLAND   | Frontal plane hip moment range of values (max – min) during landing                  |
| HipMomentPROXIMALZMAXLAND   | Peak hip external rotator moment during landing                                      |
| HipMomentPROXIMALZMINLAND   | Peak hip internal rotator moment during landing                                      |
| HipMomentPROXIMALZROMLAND   | Transverse plane hip moment range of values (max – min) during landing               |

|                |                                                                                               |
|----------------|-----------------------------------------------------------------------------------------------|
| HipStiffnessR2 | R <sup>2</sup> value of regression equation modeling hip stiffness (hip angle vs. hip moment) |
|----------------|-----------------------------------------------------------------------------------------------|

\*List of variables does not include the 4 knee measures for defining the knee LPA nor 4 hip measures used for defining the hip LPA. These are presented in Table 2.

**Appendix Table A1b.** List and descriptions of variables included in initial analysis\* continued

| Variable Name                 | Description                                                                                      |
|-------------------------------|--------------------------------------------------------------------------------------------------|
| HipStiffnessSlope             | Slope of regression equation modeling hip stiffness (hip angle vs. hip moment)                   |
| KneeAngleZEROXMINLAND         | Peak knee flexion during landing                                                                 |
| KneeAngleZEROXROMLAND         | Knee flexion angular range of motion                                                             |
| KneeAngleZEROYIC              | Frontal plane knee angle at initial contact                                                      |
| KneeAngleZEROYMAXTO           | Peak knee adduction angle during toe-off                                                         |
| KneeAngleZEROYMINLAND         | Peak knee abduction angle during landing                                                         |
| KneeAngleZEROYROMLAND         | Frontal plane knee angular range of motion during landing                                        |
| KneeAngleZEROZROMLAND         | Transverse plane knee angular range of motion during landing                                     |
| KneeFrontalPlaneAngleYMINLAND | Peak knee frontal plane projection angle during landing                                          |
| KneeMomentPROXIMALXMINLAND    | Peak knee extensor moment during landing                                                         |
| KneeMomentPROXIMALXMINTO      | Peak knee extensor moment during toe-off                                                         |
| KneeMomentPROXIMALXROMLAND    | Knee extensor moment range of values (max – min) during landing                                  |
| KneeMomentPROXIMALYMINLAND    | Peak knee abduction moment during landing                                                        |
| KneeMomentPROXIMALZROMLAND    | Transverse plane knee moment range of values (max – min) during landing                          |
| KneeStiffnessIntercept        | y-intercept of regression equation modeling knee stiffness (knee angle vs. knee moment)          |
| KneeStiffnessR2               | R <sup>2</sup> value of regression equation modeling knee stiffness (knee angle vs. knee moment) |

|                       |                                                                                   |
|-----------------------|-----------------------------------------------------------------------------------|
| KneeStiffnessSlope    | Slope of regression equation modeling knee stiffness (knee angle vs. knee moment) |
| TrunkAngleLABXMINLAND | Peak trunk flexion during landing                                                 |
| TrunkAngleLABXROMLAND | Trunk flexion angular range of motion during landing                              |

\*List of variables does not include the 4 knee measures for defining the knee LPA nor 4 hip measures used for defining the hip LPA. These are presented in Table 2.

**Appendix Table A2.** PFP status by the hip and knee profile for the 739 athletes who completed the baseline

|               | Hip Profile |            | Knee Profile |            |
|---------------|-------------|------------|--------------|------------|
|               | high-risk   | low-risk   | high-risk    | low-risk   |
| PFP (absent)  | 390(63.8%)  | 221(36.2%) | 264(43.2%)   | 347(56.8%) |
| PFP (present) | 79(68.1%)   | 37(31.9%)  | 59(50.9%)    | 57(49.1%)  |

**Appendix Table A3.** Pubertal status by the hip and knee profile for the 506 athletes who completed the baseline and the follow-up visit

|                  | Hip Profile |            | Knee Profile |            |
|------------------|-------------|------------|--------------|------------|
|                  | high-risk   | low-risk   | high-risk    | low-risk   |
| <b>Baseline</b>  |             |            |              |            |
| Pre-pubertal     | 257(82.9%)  | 53(17.1%)  | 91(29.4%)    | 219(70.6%) |
| Post-pubertal    | 97(49.5%)   | 99(50.5%)  | 119(60.7%)   | 77(39.3%)  |
| <b>Follow-up</b> |             |            |              |            |
| Pre-pubertal     | 162(69.5%)  | 71(30.5%)  | 87(37.3%)    | 146(62.7%) |
| Post-pubertal    | 127(46.5%)  | 146(53.5%) | 154(56.4%)   | 119(43.6%) |
